# Supplementary material for: A Female-Biased Odorant Receptor from Apolygus lucorum (Meyer-Dür) Tuned to Some Plant Odors
Source: PubMed Central journal article supplement (PMC5000588; doi:10.3390/ijms17081165), 2016-07-28
Supplement: ijms-17-01165-s001.pdf [file ijms-17-01165-s001.pdf]

# Supplementary Materials: A Female-Biased Odorant Receptor from *Apolygus lucorum* (Meyer-Dür) Tuned to Some Plant Odors

Zhixiang Zhang, Meiping Zhang, Shuwei Yan, Guirong Wang and Yang Liu

Table S1. All the 65 compounds tested in this study.

| Serial Number | Name                    | CAS        |
|---------------|-------------------------|------------|
| 1             | 2-Phenylethanol         | 60-12-8    |
| 2             | (Z)-3-Hexenol           | 928-96-1   |
| 3             | $\beta$ -Citronellol    | 106-22-9   |
| 4             | Geraniol                | 106-24-1   |
| 5             | (Z)-2-Hexenol           | 928-94-9   |
| 6             | Benzaldehyde            | 100-52-7   |
| 7             | (1S)-(-)-Verbenone      | 1196-01-6  |
| 8             | 1-Hexanol               | 111-27-3   |
| 9             | (S)-(Z)-Verbenol        | 18881-04-4 |
| 10            | (Z)-3-Hexenyl acetate   | 3681-71-8  |
| 11            | 3,7-Dimethyl-3-octanol  | 78-69-3    |
| 12            | (-)-Borneol             | 464-45-9   |
| 13            | (+)-Borneol             | 464-43-7   |
| 14            | (1R)-(-)-Myrtenol       | 19894-97-4 |
| 15            | (-)-(E)-Pinocarveol     | 547-61-5   |
| 16            | (-)-Linalool            | 126-91-0   |
| 17            | Linalool                | 78-70-6    |
| 18            | Methyl benzoate         | 93-58-3    |
| 19            | Myrcene                 | 123-35-3   |
| 20            | 3-Vinylbenzaldehyde     | 19955-99-8 |
| 21            | $\alpha$ -Pinene        | 80-56-8    |
| 22            | (-)- $\beta$ -Pinene    | 18172-67-3 |
| 23            | Camphene                | 79-92-5    |
| 24            | $\alpha$ -Humulene      | 6753-98-6  |
| 25            | (E)-2-Hexenyl acetate   | 2497-18-9  |
| 26            | $\alpha$ -Terpinene     | 99-86-5    |
| 27            | (-)-(E)-Caryophyllene   | 87-44-5    |
| 28            | (-)-Caryophyllene oxide | 1139-30-6  |
| 29            | Heptanal                | 111-71-7   |
| 30            | 4-Ethylbenzaldehyde     | 4748-78-1  |
| 31            | (R)-(+)-Limonene        | 5989-27-5  |
| 32            | (E)-2-Hexenal           | 6728-26-3  |
| 33            | 1-Heptanol              | 111-70-6   |
| 34            | (1R)-(-)-Myrtenal       | 18486-69-6 |
| 35            | (E)-3-Hexenol           | 928-97-2   |
| 36            | (S)-(-)-Limonene        | 5989-54-8  |
| 37            | 1,4-Diethylbenzene      | 105-05-5   |
| 38            | 4'-Ethylacetophenone    | 937-30-4   |
| 39            | Cinnamaldehyde          | 104-55-2   |
| 40            | ( $\pm$ )-Citronellal   | 106-23-0   |
| 41            | 2-Undecanone            | 112-12-9   |
| 42            | Benzyl alcohol          | 100-51-6   |

Table S1. Cont.

| Serial Number | Name                    | CAS        |
|---------------|-------------------------|------------|
| 44            | Hexyl acetate           | 142-92-7   |
| 45            | Octyl butyrate          | 110-39-4   |
| 46            | Benzyl acetate          | 140-11-4   |
| 47            | Tetradecane             | 629-59-4   |
| 48            | Nonyl acetate           | 143-13-5   |
| 49            | Hexyl acetate           | 142-92-7   |
| 50            | Tridecane               | 629-50-5   |
| 51            | Methyl salicylate       | 68917-75-9 |
| 52            | (±)-Camphor             | 76-22-2    |
| 53            | Ocimene                 | 13877-91-3 |
| 54            | Nerolidol               | 40716-66-3 |
| 55            | 2,6-Di-tert-butylphenol | 128-39-2   |
| 56            | 1-Aminoanthracene       | 610-49-1   |
| 57            | 2-Pentadecanone         | 2345-28-0  |
| 58            | Acetophenone            | 98-86-2    |
| 59            | Cumene                  | 98-82-8    |
| 60            | Cedrol                  | 77-53-2    |
| 61            | Octyl acetate           | 112-14-1   |
| 62            | Ethyl butyrate          | 105-54-4   |
| 63            | Ethyl Hexanoate         | 123-66-0   |
| 64            | β-Ionone                | 79-77-6    |
| 65            | Phenyl benzoate         | 93-99-2    |

Table S2. Primers for full length cloning, vector construction and qRT-PCR.

| Primer Name         | Sequence (5'-3')                        |
|---------------------|-----------------------------------------|
| full length cloned  |                                         |
| AlucOR46-F          | ATGGGCTACAGAGTTTATCCTCAG                |
| AlucOR46-R          | CTATGATACTTCTGCTTCATCTTGAAC             |
| AlucOrco-F          | ATGCAGAAAGTGAAGATGCACG                  |
| AlucOrco-R          | TTATTTGAGCTGCACCAACACC                  |
| vector construction |                                         |
| AlucOR46-F          | tcagggccgcccaccATGGGCTACAGAGTTTATCCTCAG |
| AlucOR46-R          | tcagcgccgcCTATGATACTTCTGCTTCATCTTGAAC   |
| AlucOrco-F          | tcagggccgcccaccATGCAGAAAGTGAAGATGCACG   |
| AlucOrco-R          | tcagcgccgcTTATTTGAGCTGCACCAACACC        |
| qRT-PCR             |                                         |
| AlucOR46-F          | GCTACCTCTTCACATCCATCTAC                 |
| AlucOR46-R          | CAGCAACGGTGTGCTTATTG                    |
| AlucActin-F         | CCTTCCTGGGTATGGAATCTTG                  |
| AlucActin-R         | TGTTGGCGTACAGGTCTTTC                    |
